# Supplementary material for: Development and Validation of a Machine Learning Model Predicting Arteriovenous Fistula Failure in a Large Network of Dialysis Clinics
Source: MDPI journal article supplement (doi:10.3390/ijerph182312355), 2021-11-24
Supplement: s1 [file s1]

**Supplementary Table S1:** All variables included in the first training iteration.

| Initial Model                                                       |
|---------------------------------------------------------------------|
| Age                                                                 |
| Albumin (mean, STD, slope, min, max, last)                          |
| Atrial Fibrillation                                                 |
| AVF position                                                        |
| AVF vintage                                                         |
| BCM Overhydration (mean, STD, slope, min, max, last)                |
| BMI                                                                 |
| Body Temperature Pre-Dialysis (mean, STD, slope, min, max, last)    |
| Calcium (mean, STD, slope, min, max, last)                          |
| Cerebrovascular Disease                                             |
| Charlson's Index                                                    |
| Chronic Pulmonary Disease                                           |
| Chronic Rheumatic Heart Disease                                     |
| Concurrent Temporary catheters                                      |
| Congestive Heart Failure                                            |
| Connective Tissue Disorders                                         |
| Coronary Artery Disease                                             |
| C-Reactive Protein (mean, STD, slope, min, max, last)               |
| Creatinine (mean, STD, slope, min, max, last)                       |
| Dementia                                                            |
| Diabetes                                                            |
| Dialysate Temperature (mean, STD, slope, min, max, last)            |
| Dry Body Weight (mean, STD, slope, min, max, last)                  |
| Dyastolic Blood Pressure Post-HD (mean, STD, slope, min, max, last) |
| Dyastolic Blood Pressure Pre-HD (mean, STD, slope, min, max, last)  |
| Effective Flow (mean, STD, slope, min, max, last)                   |
| Etiology: Diabetes                                                  |
| Etiology: Glomerulonephritis                                        |
| Etiology: Hypertension                                              |
| Etiology: PKD                                                       |
| Etiology: Tubulo-Interstitial Disease                               |
| Ferritin (mean, STD, slope, min, max, last)                         |
| Glucose (mean, STD, slope, min, max, last)                          |
| Haematocrit (mean, STD, slope, min, max, last)                      |
| Haemoglobin (mean, std, slope, min, max, last)                      |
| HD Treatment Frequency                                              |
| HD Treatment Modality                                               |
| HDL cholesterol (mean, STD, slope, min, max, last)                  |
| Heart Rate Post-HD (mean, STD, slope, min, max, last)               |
| Heart Rate Pre-HD (mean, STD, slope, min, max, last)                |
| Height                                                              |
| Hemiplegia                                                          |
| HIV                                                                 |
| Hypertension                                                        |

---

Intradialytic AVF Temperature Measures (mean, slope, sd, maximum delta, minimum delta, min, max, last)  
 Intradialytic Diastolic Blood Pressure (mean, slope, sd, maximum delta, minimum delta, min, max, last)  
 Intradialytic Heart Rate (mean, slope, sd, maximum delta, minimum delta, min, max, last)  
 Intradialytic Qb (mean, slope, sd, maximum delta, minimum delta, min, max, last)  
 Intradialytic Systolic Blood Pressure (mean, slope, sd, maximum delta, minimum delta, min, max, last)  
 Intradialytic VA Arterial Pressure Measures (mean, slope, sd, maximum delta, minimum delta, min, max, last)  
 Intradialytic VA Venous Pressure Measures (mean, slope, sd, maximum delta, minimum delta, min, max, last)  
 Ischemic Heart Disease  
 Last (Ultra filtrate Volume)/(Dry Body Weight)  
 Leukocytes (mean, STD, slope, min, max, last)  
 Liver Disease  
 Lymphocytes (mean, STD, slope, min, max, last)  
 Maturation Time  
 Max (Ultra filtrate Volume)/(Dry Body Weight)  
 MCH (mean, STD, slope, min, max, last)  
 MCV (mean, STD, slope, min, max, last)  
 Metastatic Solid Cancer  
 Needle Class (mean, mode, Last)  
 Needle Diameter (mean, mode, Last)  
 Needle Length (mean, mode, Last)  
 Needle Tube Length (mean, mode, Last)  
 Neutrophils (mean, STD, slope, min, max, last)  
 Non-metastatic cancer  
 Number of Previous AVFs  
 Number of Previous VA  
 OCM-Kt/V (mean, STD, slope, min, max, last)  
 Other Cardiovascular Comorbidities  
 Peptic Ulcer  
 Peripheral Vascular Disease  
 Phosphate (mean, STD, slope, min, max, last)  
 Platelet (mean, STD, slope, min, max, last)  
 Platelet Anti-Aggregants  
 Potassium (mean, STD, slope, min, max, last)  
 Previous AVF angiography  
 Previous AVF complications  
 Previous AVF interventions  
 Previous AVF Thromboses  
 Previous HD adverse events (i.e. intradialytic hypotensions, cramps, etc)  
 Previous Post-Dialysis adverse events  
 Proteinuria (mean, STD, slope, min, max, last)  
 PTH (mean, STD, slope, min, max, last)  
 Pulmonary Heart Disease  
 Recirculation (mean, STD, slope, min, max, last)

---

---

RRT Vintage  
 Sex  
 Smoking  
 Sodium (mean, STD, slope, min, max, last)  
 Systolic Blood Pressure Post-HD (mean, STD, slope, min, max, last)  
 Systolic Blood Pressure Pre-HD (mean, STD, slope, min, max, last)  
 Time since last therapeutic intervention on the AV  
 Total cholesterol (mean, STD, slope, min, max, last)  
 Total Infusion (mean, STD, slope, min, max, last)  
 Transferrin Saturation (mean, STD, slope, min, max, last)  
 Treatment Duration (mean, STD, slope, min, max, last)  
 Treatment Processed Blood Volume (mean, STD, slope, min, max, last)  
 Treatment Qb (mean, STD, slope, min, max, last)

Ultrafiltrate Volume (mean, STD, slope, min, max, last, CumulatedAUC)  
 Ultrafiltration Rate (mean, STD, slope, min, max, last)  
 Ultrafiltration Rate Prescription (mean, STD, slope, min, max, last)  
 Unspecified Disorder Circulatory System  
 Urea Reduction Ratio (mean, STD, slope, min, max, last)  
 Urea Volume (mean, STD, slope, min, max, last)  
 Weight Post-HD (mean, STD, slope, min, max, last)  
 Weight Pre-HD (mean, STD, slope, min, max, last)

---

**Supplementary Table S2: Detailed description of the endpoint definition**

|                                                |                                                                                  |
|------------------------------------------------|----------------------------------------------------------------------------------|
| AVF Failures                                   | AVF failure as defined by the attending physician                                |
|                                                | AVF Thrombosis                                                                   |
|                                                | Creation of a second VA due to AVF failure as defined by the attending physician |
| Vascular Access Switch                         | Switch to another Vascular Access                                                |
| Interventions aimed at re-establishing patency | Surgical revision of access                                                      |
|                                                | Angiography with PTA                                                             |
|                                                | Angiography with thrombolysis                                                    |
|                                                | Angiography with stent                                                           |
|                                                | Prothesis Interposition                                                          |
|                                                | Patch Angioplasty                                                                |
|                                                | Graft extension                                                                  |
|                                                | Graft removal                                                                    |
|                                                | Proximal re-anastomosis                                                          |
|                                                | Surgical thrombectomy                                                            |
|                                                | Mechanical thrombolysis (Fogarty)                                                |
|                                                | Angiography with angioplasty and stent placement                                 |
|                                                | Percutaneous thrombectomy with angioplasty                                       |
|                                                | Percutaneous thrombectomy with angioplasty and stent placement                   |
| AVF-related Hospitalization                    | Unspecified complication of internal prosthetic device, implant and graft        |
|                                                | Surgical operation with anastomosis, bypass or graft                             |
|                                                | Adjustment and management of vascular access device                              |

**Supplementary Table S3: breakdown of AVF Failure causes in our study**

|                                                   |       |
|---------------------------------------------------|-------|
| AVF Failure as defined by the attending Physician | 17.7% |
| Switch to a second Vascular Access                | 41.2% |
| Interventions aimed at re-establishing patency    | 40.7% |
| AVF-related Hospitalization                       | 0.4%  |

**Supplementary Table S4: Distribution of AVF-FM risk classes in 30 re-samplings of the test set.**

| Pool Number | N     | Risk Class |          |      |           |
|-------------|-------|------------|----------|------|-----------|
|             |       | Low        | Moderate | High | Very High |
| Pool1       | 34529 | 15340      | 13738    | 5330 | 121       |
| Pool2       | 34087 | 14833      | 13922    | 5208 | 124       |
| Pool3       | 34371 | 14874      | 13898    | 5476 | 123       |
| Pool4       | 35079 | 15736      | 13669    | 5559 | 115       |
| Pool5       | 34080 | 15210      | 13550    | 5207 | 113       |
| Pool6       | 33357 | 14751      | 13157    | 5330 | 119       |
| Pool7       | 34032 | 14947      | 13461    | 5491 | 133       |
| Pool8       | 34276 | 15490      | 13425    | 5232 | 129       |
| Pool9       | 35029 | 16019      | 13394    | 5492 | 124       |
| Pool10      | 33027 | 14598      | 12834    | 5494 | 101       |
| Pool11      | 33814 | 15423      | 12893    | 5374 | 124       |
| Pool12      | 33858 | 15559      | 12872    | 5313 | 114       |
| Pool13      | 35482 | 16446      | 13346    | 5550 | 140       |
| Pool14      | 34460 | 16037      | 12881    | 5414 | 128       |
| Pool15      | 33721 | 15392      | 13051    | 5186 | 92        |
| Pool16      | 34474 | 15689      | 13342    | 5312 | 131       |
| Pool17      | 34206 | 15125      | 13348    | 5632 | 101       |
| Pool18      | 33606 | 14870      | 13166    | 5447 | 123       |
| Pool19      | 33953 | 15032      | 13519    | 5283 | 119       |
| Pool20      | 33719 | 15947      | 12331    | 5318 | 123       |
| Pool21      | 34389 | 16309      | 12703    | 5223 | 154       |
| Pool22      | 33775 | 15362      | 13060    | 5237 | 116       |
| Pool23      | 33418 | 15099      | 12957    | 5258 | 104       |
| Pool24      | 34184 | 14850      | 13720    | 5494 | 120       |
| Pool25      | 33411 | 14687      | 13408    | 5193 | 123       |
| Pool26      | 34861 | 15486      | 13591    | 5640 | 144       |
| Pool27      | 34491 | 15821      | 13403    | 5145 | 122       |
| Pool28      | 34493 | 14991      | 13899    | 5489 | 114       |
| Pool29      | 34203 | 15251      | 13504    | 5336 | 112       |
| Pool30      | 33793 | 16009      | 12279    | 5393 | 112       |
| Statistics  |       |            |          |      |           |

---

|                |        |
|----------------|--------|
| I <sup>2</sup> | 94,83  |
| Cochran's Q    | 560,43 |

---
